# Supplementary material for: The prevalence of genome replacement in unisexual salamanders of the genus Ambystoma (Amphibia, Caudata) revealed by nuclear gene genealogy
Source: PubMed Central journal article supplement (PMC2413238; doi:10.1186/1471-2148-8-158), 2008-05-22
Supplement: 1471-2148-8-158-S1.pdf [file 1471-2148-8-158-S1.pdf]

## Additional file 1

Supplementary Table - Sampling locations, sample sizes (n) and L- G1C12 haplotype distributions for *Ambystoma laterale* and unisexual individuals from sites in northeast North America (see Figure 1 for the geographical distribution of sites and haplotypes).

| Site | Location                       | n                  |                  | L-G1C12 haplotypes <sup>1</sup> |           |
|------|--------------------------------|--------------------|------------------|---------------------------------|-----------|
|      |                                | <i>A. laterale</i> | Unisexual        | <i>A. laterale</i>              | Unisexual |
| 1    | Prince Edward Island           | 1                  | n/f <sup>2</sup> | A(2)                            | -         |
| 2    | Cumberland County, Nova Scotia | 2                  | n/a <sup>3</sup> | A(4)                            | -         |
| 3    | Aroostook County, ME           | 1                  | 1 (LLJ)          | A(2)                            | A(2)      |
| 4    | Hancock County, ME             | n/a                | 1 (LLJ)          | -                               | A(2)      |
| 5    | Ste. Blandine, Quebec          | n/a                | 2 (LLJ)          | -                               | A(4)      |
| 6    | Bastican, Quebec               | n/a                | 2 (LLJ)          | -                               | A(4)      |
| 7    | St. Jude, Quebec               | 1                  | n/a              | A(2)                            | -         |
| 8    | Yamaska, Quebec                | n/a                | 1 (LJ)           | -                               | A(1)      |
| 9    | Drummond, Quebec               | 2                  | n/a              | A(4)                            | -         |
| 10   | St. Jacques, Quebec            | 1                  | 4 (LLJ)          | A(2)                            | A(8)      |
| 11   | Repentigny, Quebec             | n/a                | 2 (LLJ)          | -                               | A(4)      |
| 12   | Bos St. Laurent, Quebec        | 4                  | 2 (LLJ)          | A(8)                            | A(4)      |
| 13   | Breckenridge, Quebec           | n/a                | 1 (LLJ)          | -                               | A(2)      |
| 14   | Anse-a-l'Orme, Quebec          | n/a                | 1 (LLJ)          | -                               | A(2)      |
| 15   | Mirabel, Quebec                | n/a                | 1 (LLJ)          | -                               | A(2)      |
| 16   | Lachute, Quebec                | n/a                | 2 (LLJ)          | -                               | A(4)      |
| 17   | Lanoraie, Quebec               | n/a                | 1 (LLJ)          | -                               | A(2)      |
| 18   | Ripon, Quebec                  | n/a                | 1 (LJ)           | -                               | A(1)      |

|    |                                             |     |                  |      |           |
|----|---------------------------------------------|-----|------------------|------|-----------|
| 19 | Aylmer,<br>Quebec                           | 2   | 6 (LLJ),1 (LLLJ) | A(4) | A(15)     |
| 20 | Leeds/<br>Grenville<br>Counties,<br>Ontario | n/a | 1 (LLJ)          | -    | A(2)      |
| 21 | Leeds/<br>Grenville<br>Counties,<br>Ontario | n/a | 1 (LLJ)          | -    | A(1),B(1) |
| 22 | Chapais,<br>Quebec                          | 2   | n/f              | A(4) | -         |
| 23 | St.Lawrence<br>County, NY                   | 2   | 1 (LLJ)          | A(4) | A(2)      |
| 24 | Addison<br>County, VT                       | 1   | 2 (LLJ)          | A(2) | A(4)      |
| 25 | Addison<br>County, VT                       | n/a | 1 (LJ)           | -    | A(1)      |
| 26 | Seneca/Wayne<br>Counties, NY                | 2   | 2 (LLJ)          | A(4) | A(4)      |
| 27 | Schoharie<br>County, NY                     | n/a | 2 (LJ)           | -    | A(2)      |
| 28 | Orange<br>County, NY                        | 1   | 1 (LLLJ)         | A(2) | A(3)      |
| 29 | Orange<br>County, NY                        | 3   | 4 (LLJ),1(LLLJ)  | A(6) | A(11)     |
| 30 | Orange<br>County, NY                        | 2   | 1 (LJ),1(LLJ)    | A(4) | A(3)      |
| 31 | Sussex County,<br>NJ                        | 1   | 1 (LLJ)          | A(2) | A(2)      |
| 32 | Sussex County,<br>NJ                        | n/f | 1 (LJJ)          | -    | A(1)      |
| 33 | Morris County,<br>NJ                        | 2   | 4 (LLJ),1(LLLJ)  | A(4) | A(11)     |
| 34 | Morris and<br>Somerset<br>Counties, NJ      | 2   | n/a              | A(4) | -         |
| 35 | Putnam<br>County, NY                        | 1   | n/a              | A(2) | -         |
| 36 | Dutchess<br>County, NY                      | n/f | 1 (LJJ)          | -    | A(1)      |
| 37 | Litchfield<br>County, CT                    | n/f | 1 (LJJJ)         | -    | A(1)      |
| 38 | Litchfield<br>County, CT                    | n/a | 3 (LLJ)          | -    | A(6)      |
| 39 | New Haven<br>County, CT                     | n/f | 2 (LJJ)          | -    | A(2)      |
| 40 | Worcester<br>County, MA                     | 2   | 2 (LLJ)          | A(4) | A (4)     |

|    |                                 |     |                  |                    |                    |
|----|---------------------------------|-----|------------------|--------------------|--------------------|
| 41 | Windham<br>County, CT           | 2   | n/a              | A(4)               | -                  |
| 42 | Windham<br>County, CT           | 1   | n/a              | A(2)               | -                  |
| 43 | Genesee<br>County, NY           | 2   | 1 (LLJ)          | B(1),C(3)          | B(1),C(1)          |
| 44 | McKean<br>County, PA            | 4   | 4 (LLJ)          | A(3),C(3),D<br>(2) | A(4),C(3),<br>D(1) |
| 45 | Niagara<br>County, NY           | 3   | n/a              | B(6)               | -                  |
| 46 | Erie County,<br>NY              | 2   | n/a              | B(4)               | -                  |
| 47 | Erie County,<br>NY              | 2   | n/a              | B(3),C(1)          | -                  |
| 48 | Erie County,<br>NY              | 2   | 2 (LLJ)          | B(2),C(2)          | B(1),C(3)          |
| 49 | Chautauqua<br>County, NY        | n/a | 3 (LLJ)          | -                  | B(5),C(1)          |
| 50 | Welland<br>County,<br>Ontario   | 3   | 2 (LLJ)          | B(4),C(2)          | B(3),C(1)          |
| 51 | York County,<br>Ontario         | n/a | 1 (LLJ)          | -                  | B(2)               |
| 52 | York County,<br>Ontario         | n/f | 3 (LJJ)          | -                  | C(3)               |
| 53 | York County,<br>Ontario         | n/f | 2 (LJJ)          | -                  | B(1),C(1)          |
| 54 | Halton County,<br>Ontario       | n/f | 2 (LJJ)          | -                  | C(2)               |
| 55 | York County,<br>Ontario         | n/f | 1 (LJJ)          | -                  | B(1)               |
| 56 | Peel County,<br>Ontario         | n/f | 3 (LJJ)          | -                  | C(3)               |
| 57 | Peel County,<br>Ontario         | n/f | 2 (LJJ)          | -                  | C(2)               |
| 58 | Peel County,<br>Ontario         | n/f | 2 (LJJ)          | -                  | C(2)               |
| 59 | Halton County,<br>Ontario       | n/f | 1 (LJJ)          | -                  | C(1)               |
| 60 | Halton County,<br>Ontario       | n/f | 1 (LJJ)          | -                  | C(1)               |
| 61 | Halton County,<br>Ontario       | n/f | 4 (LJJ),1 (LJJJ) | -                  | C(4),F(1)          |
| 62 | Wentworth<br>County,<br>Ontario | 3   | 1 (LLJ)          | A(4),B(2)          | A(1),B(1)          |
| 63 | Halton County,<br>Ontario       | n/f | 1 (LJJJ)         | -                  | C(1)               |

|    |                                               |     |                     |                    |                    |
|----|-----------------------------------------------|-----|---------------------|--------------------|--------------------|
| 64 | Wentworth<br>County,<br>Ontario               | 3   | 2 (LLJ)             | B(3),C(3)          | B(2),C(2)          |
| 65 | Wentworth<br>County,<br>Ontario               | 2   | 3 (LLJ)             | A(2), C(2)         | A(3),C(3)          |
| 66 | Wentworth<br>County,<br>Ontario               | 1   | 1 (LLJ)             | B(1),C(1)          | B(1),C(1)          |
| 67 | Wentworth<br>County,<br>Ontario               | n/f | 3 (LJJ)             | -                  | C(3)               |
| 68 | Wentworth<br>County,<br>Ontario               | n/a | 1(LLJ)              | -                  | A(1),B(1)          |
| 69 | Waterloo<br>County,<br>Ontario                | n/a | 4 (LLJ)             | -                  | A(4),B(4)          |
| 70 | Waterloo<br>County,<br>Ontario                | 1   | 2(LLJ),2(LJJ),1(LJ) | B(1),C(1)          | B(6),C(1)          |
| 71 | Waterloo<br>County,<br>Ontario                | n/f | 2 (LJ),4 (LJJ)      | -                  | C(6)               |
| 72 | Waterloo<br>County,<br>Ontario                | n/f | 3 (LJJ)             | -                  | B(3)               |
| 73 | Waterloo<br>County,<br>Ontario                | 5   | 5 (LLJ),1(LLLJ)     | A(2),B(3),C<br>(5) | A(5),B(6),C<br>(2) |
| 74 | Brant County,<br>Ontario                      | 1   | 2 (LLJ),1(LLLJ)     | B(1),C(1)          | B(3),C(4)          |
| 75 | Wellington<br>County,<br>Ontario              | n/f | 1 (LJJ)             | -                  | C(1)               |
| 76 | Halton County,<br>Ontario                     | n/f | 1 (LJJ)             | -                  | C(1)               |
| 77 | Waterloo<br>County,<br>Ontario                | 2   | n/a                 | C(4)               | -                  |
| 78 | Haldimand/<br>Norfolk<br>Counties,<br>Ontario | n/a | 3 (LLJ),5 (LJJ)     | -                  | B(6),C(5)          |
| 79 | Haldimand/<br>Norfolk<br>Counties,<br>Ontario | n/f | 4 (LJJ)             | -                  | B(4)               |
| 80 | Bruce County,<br>Ontario                      | n/a | 1 (LLJ)             | -                  | B(1),C(1)          |
| 81 | Lambton<br>County,<br>Ontario                 | 3   | 4 (LLJ)             | B(2),C(4)          | B(1),C(7)          |
| 82 | Essex County,<br>Ontario                      | 1   | 3 (LLJ)             | B(1),C(1)          | B(2),C(4)          |

|    |                                          |     |                             |                    |                    |
|----|------------------------------------------|-----|-----------------------------|--------------------|--------------------|
| 83 | Walpole Is.,<br>Essex County,<br>Ontario | 1   | n/a                         | C(2)               | -                  |
| 84 | Pelee Is., Essex<br>County,<br>Ontario   | n/f | 3 (LTT)                     | -                  | E(3)               |
| 85 | Pelee Is., Essex<br>County,<br>Ontario   | 1   | 1 (LLT)                     | E(2)               | E(2)               |
| 86 | Pelee Is., Essex<br>County,<br>Ontario   | 2   | n/a                         | E(4)               | -                  |
| 87 | North Bass Is.,<br>Ottawa County,<br>OH  | n/f | 1 (LTT)                     | -                  | F(1)               |
| 88 | Kelleys Is.,<br>Erie County,<br>OH       | n/f | 4 (LTTi)                    | -                  | C(1),E(3)          |
| 89 | Washtenaw<br>County, MI                  | n/f | 2 (LJJ)                     | -                  | C(2)               |
| 90 | Lenawee<br>County, MI                    | n/a | 1 (LLJ)                     | -                  | D(1),F(1)          |
| 91 | Cass County,<br>MI                       | 2   | 5(LLJ),2(LLJ),1(L<br>TTi)   | C(1),<br>D(2),F(1) | C(9),D(5),<br>F(3) |
| 92 | Jasper County,<br>IN                     | 1   | 1 (LLJ)                     | F(2)               | F(2)               |
| 93 | Wabash<br>County, IN                     | n/f | 2 (LJJ)                     | -                  | F(2)               |
| 94 | Clark County,<br>OH                      | n/f | 1(LTTi),4(LTJ),2(L<br>TJTt) | -                  | F(7)               |
| 95 | Hamilton<br>County, OH                   | n/f | 4 (LJJ)                     | -                  | F(4)               |
| 96 | Thunder Bay<br>Dist., Ontario            | 2   | n/f                         | F(4)               | -                  |
| 97 | Itasca County,<br>MN                     | 2   | 1 (LLJ)                     | F(4)               | F(2)               |

<sup>1</sup>A-F represent six haplotypes. Parenthetical letters represent unisexual genome combinations. Parenthetical numbers represent the numbers of haplotypes found in specimens when considering each haploid “L” genome as a unit. For example in site 73, five LLJ and one LLLJ unisexuals were examined and they contain in total 13 haploid “L” genomes. “A(5), B(6), C(2)” means that five of these 13 “L” genomes contain haplotype A, six of these 13 “L” genomes contain haplotype B and two of these 13 “L” genomes contain haplotype C.

<sup>2</sup> n/f: *Ambystoma laterale* or unisexual was never found from the locality.

<sup>3</sup> n/a: *Ambystoma laterale* or unisexual was not sampled from the locality but could be present.
